# Supplementary material
Source: HighWire-hosted journal article supplement (https://jnm.snmjournals.org/highwire/filestream/95362/field_highwire_adjunct_files/0/207704_Supplemental_Data.pdf)
Supplement: 207704_Supplemental_Data.pdf [file 207704_Supplemental_Data.pdf]

**Supplemental Table 1: PET activity and tumor volume.** Mean  $\pm$  SD for the different experimental groups are given for reader 1 vs. 2 and days 7 vs. 8. Background readings are averages across groups.

| Parameter                       | Reader 1     |              | Reader 2     |              |
|---------------------------------|--------------|--------------|--------------|--------------|
|                                 | day 7        | day 8        | day 7        | day 8        |
| <b>Tumor</b>                    |              |              |              |              |
| <i>Maximum %IA/g</i>            |              |              |              |              |
| RM1-YFP                         | 4 $\pm$ 1.0  |              |              |              |
| RM1-low                         | 10 $\pm$ 5.6 | 15 $\pm$ 4.7 | 10 $\pm$ 5.6 | 16 $\pm$ 4.9 |
| RM1-medium                      | 23 $\pm$ 8.3 |              |              |              |
| RM1-PGLS                        | 27 $\pm$ 12  | 25 $\pm$ 11  | 27 $\pm$ 12  | 26 $\pm$ 13  |
| <i>Average %IA/g</i>            |              |              |              |              |
| RM1-YFP                         | 2 $\pm$ 0.8  |              |              |              |
| RM1-low                         | 5 $\pm$ 2.7  | 7 $\pm$ 2.7  | 5 $\pm$ 2.7  | 7 $\pm$ 2.5  |
| RM1-MEDIUM                      | 8 $\pm$ 4.0  |              |              |              |
| RM1-PGLS                        | 11 $\pm$ 4.0 | 12 $\pm$ 4.9 | 12 $\pm$ 5.2 | 12 $\pm$ 4.7 |
| <i>Volume (mm<sup>3</sup>)</i>  |              |              |              |              |
| RM1-YFP                         | 62 $\pm$ 18  |              |              |              |
| RM1-low                         | 67 $\pm$ 42  | 97 $\pm$ 55  | 96 $\pm$ 42  | 131 $\pm$ 73 |
| RM1-medium                      | 76 $\pm$ 34  |              |              |              |
| RM1-PGLS                        | 95 $\pm$ 41  | 115 $\pm$ 45 | 86 $\pm$ 29  | 104 $\pm$ 53 |
| <i>Visual score</i>             |              |              |              |              |
| RM1-YFP                         | 0 $\pm$ 0.6  |              |              |              |
| RM1-low                         | 1 $\pm$ 0.4  | 2 $\pm$ 0.4  | 2 $\pm$ 0.0  | 2 $\pm$ 0.0  |
| RM1-medium                      | 2 $\pm$ 0.4  |              |              |              |
| RM1-PGLS                        | 3 $\pm$ 0.4  | 2 $\pm$ 0.4  | 3 $\pm$ 0.4  | 2 $\pm$ 0.4  |
| <b>Background average %IA/g</b> |              |              |              |              |
| Bloodpool                       | 2 $\pm$ 0.9  | 3 $\pm$ 1.3  | 2 $\pm$ 0.9  | 4 $\pm$ 0.9  |
| Liver                           | 3 $\pm$ 0.9  | 4 $\pm$ 1.3  | 3 $\pm$ 1.3  | 3 $\pm$ 1.7  |
| Muscle                          | 2 $\pm$ 0.9  | 3 $\pm$ 0.9  | 1 $\pm$ 1.3  | 2 $\pm$ 0.9  |

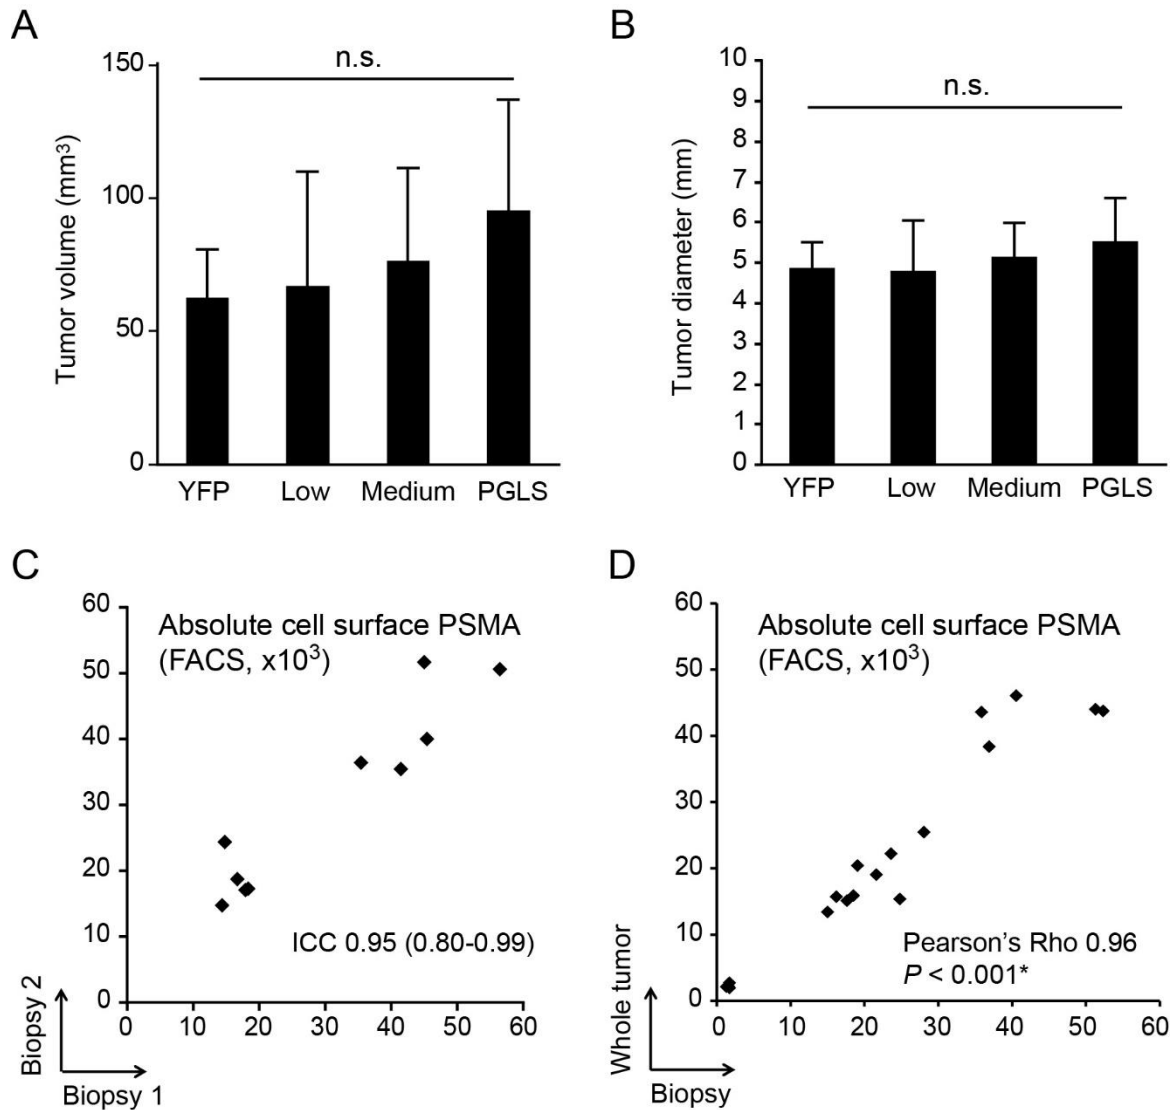

**Supplemental Figure 1: Validation of methods.** Day 7 mean  $\pm$  standard deviation tumor volume (**A**) and diameter (**B**) as determined by CT delineation shown for mice bearing YFP, low, medium or PGLS tumors. Difference was assessed by Mann-Whitney test. (**C**) Inter-day reproducibility of cell surface PSMA quantification by FACS from FNA tumor biopsies. Reproducibility was assessed by intraclass correlation (ICC, with 95% CI). (**D**) Absolute cell surface PSMA as determined by FACS for biopsies versus *ex vivo* whole tumor cell suspensions. Correlation was assessed by Pearson's test. \* $P < 0.05$  was defined as significant. n.s. = non-significant.
